# Supplementary material for: WSN Clustering Routing Algorithm based on Adaptive Grasshopper Optimization Algorithm
Source: Research Square preprint supplement (doi:10.21203/rs.3.rs-6725099/v1), 2025-06-12
Supplement: Supplementary file 1 [file 7d0867b47295f24c2046532d.xlsx]

## Sheet: Sheet1
LEACH
Number of Surviving Nodes		first 947	last 1307
100	100	100	100	100	100	100	100	100	100	100	100	100	100	100	100	100	100	100	100	100	100	100	100	100	100	100	100	100	100	100	100	100	100	100	100	100	100	100	100	100	100	100	100	100	100	100	100	100	100
Total residual energy
70	69.9321	69.8662	69.8	69.7293	69.6671	69.6048	69.5347	69.4683	69.4018	69.3373	69.2719	69.2082	69.1468	69.0764	69.0085	68.939	68.8795	68.8147	68.7513	68.683	68.6212	68.561	68.4948	68.4312	68.3702	68.3072	68.2385	68.1733	68.1003	68.0382	67.9746	67.9137	67.845	67.776	67.7082	67.6412	67.5722	67.5133	67.4514	67.3883	67.3275	67.2521	67.1931	67.1229	67.0619	66.9951	66.9259	66.8603	66.7967
Residual energy variance
3.82e-07	7.32e-07	8.24e-07	1.28e-06	1.64e-06	1.62e-06	1.45e-06	2.64e-06	2.54e-06	2.86e-06	2.96e-06	4.57e-06	4.41e-06	4.85e-06	4.73e-06	5.16e-06	6.44e-06	6.05e-06	5.89e-06	6.48e-06	6.77e-06	6.86e-06	7.74e-06	7.75e-06	7.96e-06	8.55e-06	8.46e-06	8.07e-06	7.82e-06	9e-06	8.97e-06	9.72e-06	9.59e-06	1.03e-05	1.03e-05	1.17e-05	1.22e-05	1.2e-05	1.14e-05	1.16e-05	1.33e-05	1.44e-05	1.5e-05	1.53e-05	1.54e-05	1.55e-05	1.5e-05	1.65e-05	1.59e-05	1.65e-05
LEACH-C
Number of Surviving Nodes		first 1215	last 1553
100	100	100	100	100	100	100	100	100	100	100	100	100	100	100	100	100	100	100	100	100	100	100	100	100	100	100	100	100	100	100	100	100	100	100	100	100	100	100	100	100	100	100	100	100	100	100	100	100	100
Total residual energy
69.9448	69.8896	69.8343	69.7791	69.7238	69.6685	69.6132	69.5578	69.5025	69.4471	69.3919	69.3367	69.2814	69.2262	69.1708	69.1153	69.0598	69.0044	68.949	68.8937	68.8384	68.7829	68.7276	68.6723	68.6169	68.5615	68.5062	68.4509	68.3955	68.3401	68.2848	68.2296	68.1743	68.119	68.0636	68.0082	67.9529	67.8974	67.8419	67.7866	67.7312	67.6759	67.6205	67.5653	67.51	67.4548	67.3995	67.3441	67.2888	67.2335
Residual energy variance
4.36e-07	8.04e-07	1.03e-06	1.2e-06	1.26e-06	1.32e-06	1.49e-06	1.4e-06	1.56e-06	1.76e-06	1.87e-06	2.09e-06	2.27e-06	2.42e-06	2.69e-06	2.9e-06	2.9e-06	3.28e-06	3.61e-06	3.8e-06	3.87e-06	3.75e-06	3.7e-06	3.61e-06	3.82e-06	4.11e-06	4.24e-06	4.37e-06	4.46e-06	4.96e-06	5.24e-06	5.56e-06	5.95e-06	6e-06	6.25e-06	6.09e-06	6.41e-06	6.49e-06	6.98e-06	7.51e-06	7.7e-06	7.81e-06	8.19e-06	8.45e-06	8.58e-06	8.82e-06	9.31e-06	9.65e-06	1.03e-05	1.05e-05
SEECP
Number of Surviving Nodes		first 1182	last 1199
100	100	100	100	100	100	100	100	100	100	100	100	100	100	100	100	100	100	100	100	100	100	100	100	100	100	100	100	100	100	100	100	100	100	100	100	100	100	100	100	100	100	100	100	100	100	100	100	100	100
Total residual energy
69.9436	69.8853	69.8271	69.77	69.7133	69.6556	69.5987	69.5406	69.4825	69.4248	69.367	69.3076	69.2477	69.1893	69.1302	69.0718	69.0138	68.9573	68.8995	68.8415	68.7829	68.725	68.6659	68.607	68.5475	68.4882	68.4306	68.3717	68.3126	68.2531	68.1941	68.1339	68.076	68.0179	67.9596	67.8996	67.8413	67.7835	67.7243	67.6659	67.6081	67.5494	67.4902	67.4304	67.3699	67.3113	67.2522	67.1931	67.1333	67.0743
Residual energy variance
5.45e-07	2.18e-06	4.91e-06	8.72e-06	1.36e-05	1.96e-05	2.67e-05	3.49e-05	4.42e-05	5.45e-05	6.6e-05	7.85e-05	9.21e-05	0.000106854	0.000122664	0.000139565	0.000157555	0.000176636	0.000196808	0.00021807	0.000240422	0.000263864	0.000288397	0.00031402	0.000340734	0.000368538	0.000397432	0.000427417	0.000458492	0.000490657	0.000523913	0.000558259	0.000593695	0.000630222	0.000667839	0.000706546	0.000746344	0.000787232	0.00082921	0.000872279	0.000916438	0.000961688	0.00101	0.00106	0.0011	0.00115	0.0012	0.00126	0.00131	0.00136
GWO		first 1260	last 1655
Number of Surviving Nodes
100	100	100	100	100	100	100	100	100	100	100	100	100	100	100	100	100	100	100	100	100	100	100	100	100	100	100	100	100	100	100	100	100	100	100	100	100	100	100	100	100	100	100	100	100	100	100	100	100	100
Total residual energy
69.9452	69.8833	69.8255	69.7686	69.713	69.6481	69.6082	69.546	69.4886	69.4572	69.3992	69.3301	69.2861	69.2281	69.1718	69.141	69.0855	69.0311	68.976	68.9211	68.8671	68.8072	68.767	68.7072	68.6723	68.6191	68.5637	68.5055	68.4486	68.3921	68.3365	68.2799	68.2229	68.1693	68.1132	68.048	67.9832	67.9433	67.8743	67.8303	67.7721	67.7002	67.6433	67.5775	67.5221	67.4642	67.3995	67.3397	67.2811	67.2238
Residual energy variance
--	--	--	--	--	--	--	--	--	--	--	--	--	--	--	--	--	--	--	--	--	--	--	--	--	--	--	--	--	--	--	--	--	--	--	--	--	--	--	--	--	--	--	--	--	--	--	--	--	--
IGOACR
Number of Surviving Nodes		first 1606	last 1692
100	100	100	100	100	100	100	100	100	100	100	100	100	100	100	100	100	100	100	100	100	100	100	100	100	100	100	100	100	100	100	100	100	100	100	100	100	100	100	100	100	100	100	100	100	100	100	100	100	100
Total residual energy
69.9582	69.9164	69.8746	69.8328	69.791	69.7493	69.7075	69.6657	69.6239	69.5821	69.5403	69.4985	69.4567	69.4149	69.3731	69.3314	69.2896	69.2478	69.206	69.1642	69.1224	69.0806	69.0388	68.997	68.9552	68.9134	68.8717	68.8299	68.7881	68.7463	68.7045	68.6627	68.6209	68.5791	68.5373	68.4955	68.4538	68.412	68.3702	68.3284	68.2866	68.2448	68.203	68.1612	68.1194	68.0777	68.0359	67.9941	67.9523	67.9105
Residual energy variance
4.82e-07	1.17e-06	2.08e-06	2.84e-06	3.05e-06	3.11e-06	3.03e-06	2.97e-06	2.78e-06	5.29e-06	5.9e-06	6.53e-06	6.58e-06	6.9e-06	6.96e-06	6.88e-06	7.01e-06	6.66e-06	6.56e-06	9.18e-06	1.17e-05	1.21e-05	1.4e-05	1.66e-05	1.63e-05	1.64e-05	1.56e-05	1.51e-05	1.5e-05	1.63e-05	1.69e-05	1.68e-05	1.69e-05	1.69e-05	1.8e-05	1.76e-05	1.7e-05	1.68e-05	1.63e-05	1.87e-05	1.8e-05	1.98e-05	2.02e-05	2.01e-05	2e-05	2.11e-05	2.18e-05	2.07e-05	2.04e-05	2.11e-05
[truncated: 1,950 more columns]
